# Supplementary material for: Novel peptide probes to assess the tensional state of fibronectin fibers in cancer
Source: PubMed Central journal article supplement (PMC5702617; doi:10.1038/s41467-017-01846-0), 2017-11-27
Supplement: 41467_2017_1846_MOESM2_ESM.pdf [file 41467_2017_1846_MOESM2_ESM.pdf]

## Description of Additional Supplementary Files

File Name: Supplementary Movie 1

Description: SPECT/CT rotation video of mouse bearing PC-3 xenografts 96 hours post injection of  $^{111}\text{In}$ -FnBPA5, as presented in figure 5A.

File Name: Supplementary Movie 2

Description: SPECT/CT rotation video of mouse bearing PC-3 xenografts 96 hours post injection of  $^{111}\text{In}$ -scraFnBPA5, as presented in figure 5B.

File Name: Supplementary Movie 3

Description: SPECT/CT rotation video of mouse bearing PC-3 xenografts with removed kidneys 96 hours post injection of  $^{111}\text{In}$ -FnBPA5, as presented in figure 5C.

File Name: Supplementary Movie 4

Description: : SPECT/CT rotation video of mouse bearing PC-3 xenografts with removed kidneys 96 hours post injection of  $^{111}\text{In}$ -scraFnBPA5, as presented in figure 5D.
